# Supplementary material
Source: ML conference proceedings conference paper supplement (https://openreview.net/forum?id=XvHQnCywxN)
Supplement: supplementary_material [file ![Submitted]_CLIP_DCA_Appendix.pdf › ![Submitted]_CLIP_DCA_Appendix.pdf]

## 1 A Training Details

2 For all experiments, we used the CLIP ViT-B/32 model. Models were finetuned on the ImageNet-1k  
3 training set for 5 epochs. The official ImageNet validation set was used. We used the AdamW  
4 optimizer with a learning rate of  $1e-5$ , with a cosine learning rate scheduler. Due to computational  
5 constraints, a consistent batch size of 128 was maintained across all methods. For baseline methods,  
6 any additional method-specific hyperparameters were adopted from the default configurations pro-  
7 vided in their publicly available codebases. All experiments were conducted with a single NVIDIA  
8 RTX A5000 GPU and an AMD EPYC 7763 CPU.

## 9 B Datasets

10 We report all target datasets used for our experiments. Note that for training, the ImageNet-1K  
11 training set was used.

Table B.1: List of datasets used in experiments, including number of classes and images. DG benchmarks are listed first. Each domain within a DG benchmark is treated as a distinct dataset. The number of images represent the validation/test set.

| Dataset Name                                 | Brief Description                                                 | # Classes | # Images |
|----------------------------------------------|-------------------------------------------------------------------|-----------|----------|
| <b>Domain Generalization (DG) Benchmarks</b> |                                                                   |           |          |
| <b>Digits DG</b>                             | Collection of digit recognition datasets.                         | –         | –        |
| MNIST                                        | Grayscale handwritten digits (28x28).                             | 10        | 6,000    |
| MNIST-M                                      | MNIST digits with color patches blended from BSDS500.             | 10        | 6,000    |
| SVHN                                         | Colored house numbers from Google Street View images (32x32).     | 10        | 6,000    |
| SYN                                          | Synthetically generated digit images (32x32).                     | 10        | 6,000    |
| <b>Terra Incognita</b>                       | Camera trap images of wild animals from different locations.      | –         | –        |
| Location 100                                 | Animal images from Location 100.                                  | 10        | 4,741    |
| Location 38                                  | Animal images from Location 38.                                   | 10        | 9,736    |
| Location 43                                  | Animal images from Location 43.                                   | 10        | 3,970    |
| Location 46                                  | Animal images from Location 46.                                   | 10        | 5,883    |
| <b>PACS</b>                                  | Object recognition with domain shifts.                            | –         | –        |
| Art Painting                                 | Artistic paintings of objects.                                    | 7         | 2,048    |
| Cartoon                                      | Cartoon images of objects.                                        | 7         | 2,344    |
| Photo                                        | Photographic images of objects.                                   | 7         | 1,670    |
| Sketch                                       | Sketch drawings of objects.                                       | 7         | 3,929    |
| <b>Office-Home</b>                           | Object recognition in different settings.                         | –         | –        |
| Art                                          | Artistic depictions of everyday objects.                          | 65        | 1,972    |
| Clipart                                      | Clipart images of everyday objects.                               | 65        | 3,910    |
| Product                                      | Product images of everyday objects (typically clean backgrounds). | 65        | 3,984    |
| Real                                         | Real-world photographic images of everyday objects.               | 65        | 3,902    |
| <b>Individual Benchmark Datasets</b>         |                                                                   |           |          |
| Caltech-101                                  | 101 object categories (+1 background).                            | 101       | 8,677    |
| Oxford-IIIT Pets                             | Images of pet breeds.                                             | 37        | 3,669    |
| Oxford Flowers 102                           | Images of flower categories.                                      | 102       | 6,149    |
| Stanford Cars                                | Images of car makes, models, and years.                           | 196       | 8,041    |
| Food-101                                     | Images of food categories.                                        | 101       | 25,250   |
| FGVC Aircraft                                | Images of aircraft variants.                                      | 100       | 3,333    |

Continued on next page

Table B.1 – continued from previous page

| Dataset Name                                            | Brief Description                                                            | # Classes | # Images |
|---------------------------------------------------------|------------------------------------------------------------------------------|-----------|----------|
| SUN397                                                  | Scene understanding dataset with scene categories.                           | 397       | 108,754  |
| Describable Textures Dataset (DTD)                      | Textures in the wild, organized by 47 human-perceivable attributes.          | 47        | 1,880    |
| EuroSAT                                                 | Satellite imagery of land use and land cover classes.                        | 10        | 27,000   |
| UCF101                                                  | Action recognition dataset of human action categories from videos.           | 101       | 13,320   |
| ImageNet-1K                                             | 1.28M natural images in 1000 classes (ILSVRC 2012).                          | 1000      | 50,000   |
| ImageNet-V2                                             | New test set for ImageNet-1K.                                                | 1000      | 50,889   |
| ImageNet-Sketch                                         | Sketch images corresponding to ImageNet-1K.                                  | 1000      | 50,000   |
| ImageNet-A                                              | "Natural adversarial examples" of 200 classes.                               | 200       | 7,500    |
| ImageNet-R                                              | "Renditions" (art, cartoons, etc.) of 200 ImageNet classes.                  | 200       | 30,000   |
| <b>WILDS Benchmark Datasets (Treated as Individual)</b> |                                                                              |           |          |
| Camelyon17-Wilds                                        | Histopathological images for tumor detection with hospital-based shifts.     | 2         | 85,054   |
| FMOW-Wilds                                              | Satellite imagery for land use classification with temporal/regional shifts. | 62        | 53,473   |

## 12 C Accuracy details

13 This section provides accuracy details for all target datasets. We report accuracies for both the original  
 14 weights (before unlearning) and the unlearned weights. The average value across all datasets were  
 15 reported in the main manuscript.

### 16 C.1 Using original weights (before unlearning)

Table C.1: Model performance on each dataset for all baselines using the original weights

| Dataset Name           | Zeroshot | FLYP | DANN | Adapter | CoOp | OOD  | Ours |
|------------------------|----------|------|------|---------|------|------|------|
| <b>Digits DG</b>       |          |      |      |         |      |      |      |
| MNIST                  | 22.4     | 26.7 | 27.6 | 24.2    | 23.6 | 15.4 | 27.8 |
| MNIST-M                | 16.8     | 18.4 | 22.7 | 11.9    | 14.9 | 17.3 | 16.2 |
| SVHN                   | 16.1     | 13.1 | 15.1 | 11.6    | 13.1 | 12.8 | 12.8 |
| SYN                    | 24.5     | 21.1 | 28.0 | 15.4    | 16.0 | 18.3 | 23.7 |
| <b>Terra Incognita</b> |          |      |      |         |      |      |      |
| Location 100           | 4.7      | 21.9 | 12.3 | 18.6    | 18.9 | 15.2 | 42.2 |
| Location 38            | 4.8      | 32.3 | 34.7 | 20.6    | 20.4 | 11.4 | 35.6 |
| Location 43            | 31.9     | 30.4 | 26.1 | 27.7    | 27.0 | 12.5 | 32.4 |
| Location 46            | 23.1     | 32.1 | 24.3 | 23.0    | 22.4 | 7.2  | 36.4 |
| <b>PACS</b>            |          |      |      |         |      |      |      |
| Art Painting           | 95.2     | 91.4 | 89.3 | 96.2    | 96.0 | 74.5 | 95.1 |
| Cartoon                | 96.7     | 87.4 | 90.4 | 96.8    | 96.5 | 72.4 | 95.9 |
| Photo                  | 99.5     | 99.3 | 99.3 | 99.6    | 99.7 | 86.7 | 99.7 |
| Sketch                 | 83.3     | 75.9 | 58.7 | 84.1    | 84.0 | 68.8 | 88.3 |
| <b>Office-Home</b>     |          |      |      |         |      |      |      |

Continued on next page

Table C.1 – continued from previous page

| Dataset Name                 | Zeroshot | FLYP | DANN | Adapter | CoOp | OOD  | Ours |
|------------------------------|----------|------|------|---------|------|------|------|
| Art                          | 77.5     | 73.8 | 72.2 | 78.3    | 77.4 | 63.5 | 77.6 |
| Clipart                      | 61.4     | 56.8 | 56.3 | 64.1    | 63.9 | 58.7 | 62.2 |
| Product                      | 85.9     | 78.0 | 77.2 | 87.3    | 86.8 | 70.0 | 84.8 |
| Real                         | 86.7     | 80.3 | 79.4 | 88.3    | 87.6 | 70.6 | 86.9 |
| Caltech-101                  | 83.4     | 84.5 | 83.0 | 83.2    | 83.4 | 63.1 | 88.9 |
| Oxford-IIIT Pets             | 83.9     | 73.2 | 74.6 | 85.9    | 83.8 | 64.3 | 84.6 |
| Oxford Flowers 102           | 60.1     | 30.8 | 31.4 | 64.6    | 64.9 | 9.2  | 53.2 |
| Stanford Cars                | 52.2     | 20.0 | 21.2 | 56.4    | 55.7 | 1.6  | 40.6 |
| Food-101                     | 80.2     | 50.3 | 51.5 | 83.6    | 83.1 | 19.0 | 74.9 |
| FGVC Aircraft                | 16.1     | 4.4  | 4.6  | 17.6    | 17.5 | 2.4  | 12.5 |
| SUN397                       | 60.2     | 51.8 | 51.0 | 57.8    | 58.3 | 30.6 | 63.8 |
| Describable Textures Dataset | 40.7     | 28.8 | 28.7 | 40.1    | 39.6 | 11.7 | 39.5 |
| EuroSAT                      | 30.3     | 26.0 | 23.9 | 38.1    | 38.2 | 16.2 | 39.2 |
| UCF101                       | 61.1     | 48.4 | 48.8 | 63.6    | 63.1 | 29.4 | 62.3 |
| ImageNet-1K                  | 54.2     | 69.1 | 69.0 | 59.5    | 59.9 | 71.0 | 75.0 |
| ImageNet-V2                  | 48.4     | 58.1 | 58.0 | 52.9    | 52.7 | 60.2 | 64.1 |
| ImageNet-Sketch              | 32.3     | 35.3 | 33.1 | 32.3    | 32.8 | 40.5 | 42.9 |
| ImageNet-A                   | 26.2     | 18.1 | 18.3 | 28.5    | 27.9 | 13.6 | 26.2 |
| ImageNet-R                   | 59.7     | 55.8 | 53.7 | 58.9    | 58.8 | 45.2 | 65.0 |
| Camelyon-Wilds               | 50.2     | 50.0 | 51.0 | 50.1    | 50.1 | 50.0 | 56.9 |
| FMOW-V2 Wilds                | 16.5     | 7.9  | 9.8  | 13.2    | 12.8 | 11.3 | 12.9 |

17 **C.2 Using unlearned weights (after unlearning)**

Table C.2: Model performance on each dataset for all baselines using the unlearned weights

| Dataset Name           | Zeroshot | FLYP | DANN | Adapter | CoOp | OOD  | Ours |
|------------------------|----------|------|------|---------|------|------|------|
| <b>Digits DG</b>       |          |      |      |         |      |      |      |
| MNIST                  | 33.5     | 22.4 | 28.4 | 29.3    | 28.9 | 18.9 | 40.6 |
| MNIST-M                | 25.4     | 16.7 | 17.1 | 23.4    | 24.8 | 15.8 | 24.7 |
| SVHN                   | 13.8     | 13.5 | 12.0 | 15.7    | 16.7 | 12.0 | 16.5 |
| SYN                    | 24.6     | 22.8 | 18.1 | 17.4    | 19.7 | 13.0 | 29.0 |
| <b>Terra Incognita</b> | –        | –    | –    |         |      |      |      |
| Location 100           | 27.8     | 13.6 | 22.9 | 23.2    | 22.5 | 9.1  | 21.5 |
| Location 38            | 5.8      | 31.8 | 27.0 | 4.7     | 6.1  | 2.5  | 40.4 |
| Location 43            | 26.5     | 27.6 | 25.9 | 22.2    | 23.4 | 9.2  | 28.1 |
| Location 46            | 28.4     | 25.8 | 30.9 | 30.0    | 32.4 | 5.1  | 32.0 |
| <b>PACS</b>            | –        | –    | –    |         |      |      |      |
| Art Painting           | 93.8     | 87.0 | 86.3 | 93.9    | 92.9 | 65.2 | 92.1 |
| Cartoon                | 94.6     | 82.8 | 87.8 | 92.1    | 94.1 | 63.4 | 92.8 |
| Photo                  | 99.5     | 99.5 | 99.0 | 99.0    | 98.0 | 80.0 | 99.6 |
| Sketch                 | 30.0     | 71.1 | 32.5 | 31.2    | 32.2 | 58.5 | 79.7 |
| <b>Office-Home</b>     | –        | –    | –    |         |      |      |      |
| Art                    | 68.2     | 68.1 | 67.1 | 68.7    | 68.7 | 62.7 | 76.8 |
| Clipart                | 50.7     | 53.7 | 53.3 | 47.0    | 46.7 | 50.9 | 61.3 |
| Product                | 77.2     | 73.7 | 73.6 | 73.2    | 73.9 | 61.7 | 81.3 |
| Real                   | 80.4     | 76.9 | 76.9 | 78.9    | 78.1 | 66.6 | 83.4 |
| Caltech-101            | 83.1     | 81.4 | 80.2 | 83.2    | 82.3 | 69.9 | 86.5 |
| Oxford-IIIT Pets       | 74.9     | 71.0 | 69.3 | 74.2    | 76.4 | 67.5 | 81.0 |
| Oxford Flowers 102     | 43.5     | 19.3 | 16.7 | 43.5    | 42.6 | 8.3  | 45.7 |

Continued on next page

Table C.2 – continued from previous page

| Dataset Name                 | Zeroshot | FLYP | DANN | Adapter | CoOp | OOD  | Ours |
|------------------------------|----------|------|------|---------|------|------|------|
| Stanford Cars                | 30.6     | 11.1 | 10.8 | 30.6    | 31.8 | 5.6  | 39.6 |
| Food-101                     | 66.3     | 34.3 | 33.6 | 65.9    | 63.4 | 17.4 | 62.4 |
| FGVC Aircraft                | 8.0      | 2.7  | 2.2  | 8.0     | 7.1  | 1.1  | 9.4  |
| SUN397                       | 56.7     | 44.7 | 44.9 | 56.1    | 54.3 | 30.8 | 59.9 |
| Describable Textures Dataset | 30.7     | 25.6 | 24.9 | 31.1    | 30.2 | 9.8  | 35.0 |
| EuroSAT                      | 30.5     | 27.7 | 28.8 | 30.0    | 31.5 | 14.3 | 29.0 |
| UCF101                       | 55.5     | 42.1 | 41.8 | 55.1    | 56.6 | 36.7 | 56.9 |
| ImageNet-1K                  | 46.0     | 69.8 | 70.0 | 52.9    | 53.3 | 69.0 | 75.1 |
| ImageNet-V2                  | 40.4     | 58.4 | 58.2 | 45.7    | 46.2 | 58.2 | 63.9 |
| ImageNet-Sketch              | 27.4     | 34.7 | 33.2 | 28.4    | 29.1 | 35.3 | 42.2 |
| ImageNet-A                   | 15.1     | 15.0 | 16.5 | 15.0    | 16.1 | 15.0 | 22.9 |
| ImageNet-R                   | 51.6     | 52.6 | 52.0 | 51.6    | 52.8 | 45.8 | 62.2 |
| Camelyon-Wilds               | 50.2     | 53.0 | 51.9 | 60.0    | 59.7 | 50.5 | 55.0 |
| FMOW-V2 Wilds                | 10.1     | 8.2  | 8.7  | 10.3    | 9.7  | 4.7  | 12.4 |

## 18 D OOD scores

19 This section provides the OOD scores for all target datasets. We report the OOD scores for both the  
 20 original weights (before unlearning) and the unlearned weights. The average value was used to create  
 21 the graphs in the main manuscript.

### 22 D.1 Using original weights (before unlearning)

Table D.1: Out-of-Distribution (OOD) detection scores using original weights.

| Dataset Name           | SNGP | Label | Average |
|------------------------|------|-------|---------|
| <b>Digits DG</b>       | –    | –     | –       |
| MNIST                  | 12.4 | 97.3  | 54.9    |
| MNIST-M                | 8.1  | 97.8  | 52.9    |
| SVHN                   | 8.8  | 97.1  | 52.9    |
| SYN                    | 20.1 | 95.3  | 57.7    |
| <b>Terra Incognita</b> | –    | –     | –       |
| Location 100           | 10.0 | 92.5  | 51.2    |
| Location 38            | 8.9  | 95.7  | 52.3    |
| Location 43            | 9.5  | 94.1  | 51.8    |
| Location 46            | 7.9  | 95.5  | 51.7    |
| <b>PACS</b>            | –    | –     | –       |
| Art Painting           | 20.4 | 93.4  | 56.9    |
| Cartoon                | 33.6 | 92.9  | 63.2    |
| Photo                  | 29.6 | 80.0  | 54.8    |
| Sketch                 | 35.1 | 92.3  | 63.7    |
| <b>Office-Home</b>     | –    | –     | –       |
| Art                    | 34.8 | 77.6  | 56.2    |
| Clipart                | 28.8 | 83.2  | 56.0    |
| Product                | 45.1 | 72.0  | 58.5    |
| Real                   | 43.1 | 69.6  | 56.3    |
| Caltech-101            | 39.3 | 76.5  | 57.9    |
| Oxford-IIIT Pets       | 57.2 | 62.6  | 59.9    |
| Oxford Flowers 102     | 96.8 | 83.9  | 90.3    |
| Stanford Cars          | 98.7 | 76.2  | 87.5    |

Continued on next page

**Table D.1 – continued from previous page**

| <b>Dataset Name</b>             | <b>SNGP</b> | <b>Label</b> | <b>Average</b> |
|---------------------------------|-------------|--------------|----------------|
| Food-101                        | 93.4        | 77.7         | 85.6           |
| FGVC Aircraft                   | 97.9        | 33.7         | 65.8           |
| SUN397                          | 71.6        | 76.7         | 74.2           |
| Describable Textures Dataset    | 32.3        | 86.7         | 59.5           |
| EuroSAT                         | 50.5        | 98.2         | 74.3           |
| UCF101                          | 74.4        | 84.4         | 79.4           |
| ImageNet-1K                     | 51.6        | 0.0          | 25.8           |
| ImageNet-V2                     | 66.3        | 0.0          | 33.1           |
| ImageNet-Sketch                 | 85.5        | 0.0          | 42.8           |
| ImageNet-A                      | 87.7        | 0.0          | 43.9           |
| ImageNet-R                      | 87.8        | 0.0          | 43.9           |
| <b>WILDS Benchmark Datasets</b> |             |              |                |
| Camelyon-Wilds                  | 0.8         | 79.2         | 40.0           |
| FMOW-V2 Wilds                   | 60.5        | 95.7         | 78.1           |

23 **D.2 Using unlearned weights (after unlearning)**

Table D.2: Out-of-Distribution (OOD) detection scores for unlearned model.

| <b>Dataset Name</b>          | <b>SNGP</b> | <b>Label</b> | <b>Average</b> |
|------------------------------|-------------|--------------|----------------|
| <b>Digits DG</b>             | –           | –            | –              |
| MNIST                        | 93.2        | 40.2         | 66.7           |
| MNIST-M                      | 97.4        | 26.4         | 61.9           |
| SVHN                         | 97.5        | 2.5          | 50.0           |
| SYN                          | 98.8        | 16.4         | 57.6           |
| <b>Terra Incognita</b>       | –           | –            | –              |
| Location 100                 | 95.1        | 6.9          | 51.0           |
| Location 38                  | 95.7        | 4.6          | 50.1           |
| Location 43                  | 94.5        | 15.8         | 55.1           |
| Location 46                  | 96.7        | 12.3         | 54.5           |
| <b>PACS</b>                  | –           | –            | –              |
| Art Painting                 | 93.5        | 32.7         | 63.1           |
| Cartoon                      | 93.2        | 39.0         | 66.1           |
| Photo                        | 79.4        | 48.0         | 63.7           |
| Sketch                       | 97.3        | 19.3         | 58.3           |
| <b>Office-Home</b>           | –           | –            | –              |
| Art                          | 81.6        | 43.6         | 62.6           |
| Clipart                      | 87.0        | 40.9         | 64.0           |
| Product                      | 77.9        | 52.0         | 65.0           |
| Real                         | 94.7        | 55.0         | 74.8           |
| Caltech-101                  | 76.6        | 55.8         | 66.2           |
| Oxford-IIIT Pets             | 68.0        | 46.4         | 57.2           |
| Oxford Flowers 102           | 81.7        | 98.4         | 90.1           |
| Stanford Cars                | 74.7        | 95.2         | 85.0           |
| Food-101                     | 78.5        | 89.6         | 84.0           |
| FGVC Aircraft                | 38.5        | 92.8         | 65.7           |
| SUN397                       | 77.6        | 83.4         | 80.5           |
| Describable Textures Dataset | 87.9        | 53.2         | 70.6           |
| EuroSAT                      | 98.1        | 26.3         | 62.2           |
| UCF101                       | 86.1        | 81.0         | 83.5           |

Continued on next page

Table D.2 – continued from previous page

| Dataset Name                    | SNGP | Label | Average |
|---------------------------------|------|-------|---------|
| ImageNet-1K                     | 59.7 | 0.0   | 29.9    |
| ImageNet-V2                     | 71.8 | 0.0   | 35.9    |
| ImageNet-Sketch                 | 89.6 | 0.0   | 44.8    |
| ImageNet-A                      | 88.8 | 0.0   | 44.4    |
| ImageNet-R                      | 89.4 | 0.0   | 44.7    |
| <b>WILDS Benchmark Datasets</b> |      |       |         |
| Camelyon-Wilds                  | 92.9 | 24.3  | 58.6    |
| FMOW-V2 Wilds                   | 95.8 | 63.0  | 79.4    |

## 24 E Hyperparameter tuning

25 This section provides details for hyperparameter tuning. In the main manuscript, we report 6  
 26 different losses for the distinction between source data and diffusion generated data ( $C_1$  -  $C_6$ ). For  
 27 hyperparameter tuning, we group these losses into four terms.  $C_2$  and  $C_3$  are grouped together as  
 28 the *image disentangle* term, while  $C_1$  and  $C_4$  are grouped together as the *text disentangle* term. We  
 29 report our hyperparameter tuning in Table . Due to computation limitation, the tuning was limited to  
 30 single term increments.

Table E.1: Average accuracy across 33 datasets for specific hyperparameter combinations.

| MLLM hidden state  | MLLM description   | Text disentangle   | Image disentangle  | Avg. Acc. (%) |
|--------------------|--------------------|--------------------|--------------------|---------------|
| $1 \times 10^{-4}$ | $1 \times 10^{-4}$ | $1 \times 10^{-4}$ | $1 \times 10^{-4}$ | 50.8          |
| $1 \times 10^{-3}$ | $1 \times 10^{-4}$ | $1 \times 10^{-4}$ | $1 \times 10^{-4}$ | 49.6          |
| $1 \times 10^{-2}$ | $1 \times 10^{-4}$ | $1 \times 10^{-4}$ | $1 \times 10^{-4}$ | 49.0          |
| $1 \times 10^{-1}$ | $1 \times 10^{-4}$ | $1 \times 10^{-4}$ | $1 \times 10^{-4}$ | 50.2          |
| $1 \times 10^{-4}$ | $1 \times 10^{-3}$ | $1 \times 10^{-4}$ | $1 \times 10^{-4}$ | 51.3          |
| $1 \times 10^{-4}$ | $1 \times 10^{-2}$ | $1 \times 10^{-4}$ | $1 \times 10^{-4}$ | 50.4          |
| $1 \times 10^{-4}$ | $1 \times 10^{-1}$ | $1 \times 10^{-4}$ | $1 \times 10^{-4}$ | 49.6          |
| $1 \times 10^{-4}$ | $1 \times 10^{-4}$ | $1 \times 10^{-3}$ | $1 \times 10^{-4}$ | 52.1          |
| $1 \times 10^{-4}$ | $1 \times 10^{-4}$ | $1 \times 10^{-2}$ | $1 \times 10^{-4}$ | 51.4          |
| $1 \times 10^{-4}$ | $1 \times 10^{-4}$ | $1 \times 10^{-1}$ | $1 \times 10^{-4}$ | 51.0          |
| $1 \times 10^{-4}$ | $1 \times 10^{-4}$ | $1 \times 10^{-4}$ | $1 \times 10^{-3}$ | 50.6          |
| $1 \times 10^{-4}$ | $1 \times 10^{-4}$ | $1 \times 10^{-4}$ | $1 \times 10^{-2}$ | 49.6          |
| $1 \times 10^{-4}$ | $1 \times 10^{-4}$ | $1 \times 10^{-4}$ | $1 \times 10^{-1}$ | 49.1          |
| $1 \times 10^{-4}$ | $1 \times 10^{-4}$ | $1 \times 10^{-3}$ | $1 \times 10^{-4}$ | 52.1 (Best)   |

## 31 F Prompts Used for Multi-Modal Language Models (MLLMs)

32 This section details the specific prompts provided to Multi-Modal Language Models (MLLMs) for  
 33 the generation tasks.

### 34 F.1 Prompt to MLLM to generate ideas for different styles of images

35 The following prompt was used to instruct the MLLM to generate a diverse list of image style ideas:

36 Give me ideas of 512 different styles of images.  
 37 Each style should be less than 5 words. Do not overlap styles.  
 38 Make the styles diverse.  
 39 Be brief.

## 40 **F.2 Prompt to MLLM to generate descriptions and hidden states**

41 The following prompt was used to instruct the MLLM to generate detailed descriptions of image  
 42 styles (independent of object category) and to also extract corresponding hidden states. The following  
 43 prompt was input together with images in each style:

44 Attached are multiple images in the same style.  
 45 Describe the aspects of the style that applies regardless of category.  
 46 Provide a description.  
 47 Do not describe the object in the image, but the style of image.  
 48 Be as detailed, complete, and comprehensive as possible.  
 49 Explain every minute detail.

## 50 **G List of all synthetic styles**

51 This section provides the list of all synthetic style ideas that were generated by the LLM.

52 Table G.1 shows the 512 distinct style prompts used for generating synthetic data. The styles are  
 53 listed alphabetically across the columns.

Table G.1: List of 512 synthetic data generation styles (alphabetical order).

|                                   |                                     |                                   |                                    |
|-----------------------------------|-------------------------------------|-----------------------------------|------------------------------------|
| 3D rendered image                 | 3D rendering, virtual objects       | ASCII art text                    | ASCII art, text characters         |
| Aboriginal dot painting           | Abstract expressionism              | Abstract expressionism art        | Abstract symbolic representation   |
| Abstract, non-representational    | Abstract, non-representational form | Achromatic grayscale image        | Achromatic, no color               |
| Acrylic paint vibrant             | Action painting, dynamic            | Aerial drone footage              | Afrofuturism cultural sci-fi       |
| Algorithmic art, code-based       | Ambient light, natural tones        | American scene painting           | Analog film, imperfections         |
| Analogous colors harmony          | Anamorphic distorted perspective    | Ancient Egyptian hieroglyphs      | Animal at rest                     |
| Animal drinking, water source     | Animal eye contact                  | Animal fighting, intense conflict | Animal grooming, self-care         |
| Animal hiding, partially obscured | Animal hunting, focused gaze        | Animal looking away               | Animal marking territory           |
| Animal mid-stride                 | Animal playing, energetic           | Animal sleeping, peaceful         | Animal tracks, foreground focus    |
| Animal vocalizing, mouth open     | Anime Japanese animation            | Anime, Japanese animation         | Architectural, building structures |
| Art Deco geometry                 | Art Nouveau curves                  | Artificial light controlled       | Arts and Crafts                    |
| Assemblage found objects          | Assemblage, 3D collage              | Astrophotography star trails      | Asymmetrical dynamic balance       |
| Asymmetry, unbalanced design      | Augmented reality, overlaid         | Autumn leaves, warm palette       | Available light natural            |
| Avant-garde, experimental         | Backlit silhouette lighting         | Backlit subject, glowing outline  | Baroque dramatic lighting          |
| Bio art, living organisms         | Biopunk organic technology          | Biopunk, genetic engineering      | Bird's-eye view elevated           |
| Bird's-eye view, distant          | Black and white film                | Blacklight fluorescent colors     | Blooming flowers, vibrant colors   |
| Blue hour twilight                | Blueprint architectural plan        | Body art, human canvas            | Bokeh light effect                 |
| Bold geometric patterns           | Boomerang, looping video            | Botanical art, plant subjects     | Bright cheerful aesthetic          |
| Broad lighting face               | Butterfly lighting beauty           | Byzantine mosaic icons            | Calligraphy elegant lettering      |

Continued on next page

**Table G.1 – continued from previous page**

|                                     |                                      |                                 |                                    |
|-------------------------------------|--------------------------------------|---------------------------------|------------------------------------|
| Calligraphy, elegant handwriting    | Camera flash, harsh light            | Camouflaged animal, hidden      | Candid street photography          |
| Candid, unposed moment              | Caricature exaggerated features      | Cartoon simplified drawing      | Cartoon, exaggerated features      |
| Cave entrance, dark frame           | Cave painting prehistoric            | Charcoal sketch drawing         | Charcoal sketch, rough lines       |
| Chibi cute style                    | Chromatic aberration, color fringing | Cinemagraph, subtle movement    | Claymation stop-motion animation   |
| Clear sky, bright blue              | Close up macro                       | Close-up, animal portrait       | Close-up, feather detail           |
| Close-up, fur texture               | Close-up, scale pattern              | Cloudscape art, sky scenes      | Collage mixed media                |
| Collage, mixed media                | Color contrast, complementary        | Color field painting            | Color grading cinematic            |
| Color splash accent                 | Color temperature cool               | Color temperature warm          | Comic book style                   |
| Comic book, panel style             | Complementary colors contrast        | Conceptual, idea-driven         | Cross polarization, vibrant colors |
| Cross-hatching line work            | Cross-processed film                 | Cross-processed, altered colors | Cubism, geometric shapes           |
| Cubist geometric forms              | Cyanotype process print              | Cyanotype, blue print           | Cyberpunk cityscape night          |
| Cyberpunk style, dystopian future   | Daguerreotype antique look           | Dark ominous undertones         | Data bending corrupted             |
| Data visualization, information art | Decorative, ornamental style         | Decoupage, glued paper cutouts  | Deep focus sharp                   |
| Delicate fine details               | Dense jungle, lush green             | Depth of field                  | Depth of field, blurred/sharp      |
| Desaturated muted colors            | Desaturated, almost monochrome       | Dieselpunk retro-futuristic     | Different species together         |
| Diffuse reflection matte            | Digital art, computer-generated      | Digital glitchy aesthetic       | Digital noise, grain effect        |
| Digital painting software           | Digital print, inkjet/laser          | Distortion, warped perspective  | Documentary style, realistic       |
| Doodle art casual                   | Double exposure overlay              | Double exposure, ghost image    | Dramatic low-key lighting          |
| Dramatic sky, storm clouds          | Dramatic spotlight, single source    | Dreamy ethereal soft focus      | Duotone color scheme               |
| Duotone, two-color palette          | Dusty trail, arid environment        | Dutch angle tilted              | Dynamic energetic composition      |
| Earth art, natural materials        | Embroidery thread texture            | Engraving detailed metal        | Engraving, incised lines           |
| Environmental art, nature-focused   | Environmental portrait, surroundings | Establishing shot context       | Etching fine lines                 |
| Etching, acid-etched lines          | Expressionist bold colors            | Extreme close-up detail         | Extreme close-up, eye detail       |
| Fantasy art, mythical creatures     | Fashion illustration stylish         | Fashion, clothing focus         | Fast motion, sped-up action        |
| Fauvist wild beasts                 | Feeding animals, close action        | Film noir style                 | Fine art, aesthetic focus          |
| Fish-eye lens view                  | Fish-eye lens, distorted             | Flat lay top-down               | Flowing river, blurred water       |
| Focus stacking, all sharp           | Foggy morning, atmospheric haze      | Folk art naive                  | Folk art, traditional craft        |
| Forced perspective trick            | Forced perspective, size illusion    | Formal, posed shot              | Found object art                   |
| Fractal art mathematical            | Fractal art, mathematical            | Frontlit subject, clear view    | Frozen lake, icy surface           |
| Full shot composition               | Futuristic sci-fi vision             | Futuristic style, advanced      | Generative art algorithmic         |

Continued on next page



**Table G.1 – continued from previous page**

|                                     |                                 |                                  |                                        |
|-------------------------------------|---------------------------------|----------------------------------|----------------------------------------|
| Generative art, algorithms          | Geometric abstract pattern      | Glamour, idealized beauty        | Glassblowing molten glass              |
| Glitch art digital                  | Glitch art distortion           | Glitch art, corrupted data       | Glitch art, digital errors             |
| Golden hour sunlight                | Golden ratio composition        | Golden ratio, proportions        | Gothic art, dark, romantic             |
| Gothic dark shadows                 | Gouache opaque matte            | Graffiti art, street tagging     | Graffiti wildstyle lettering           |
| Graffiti, tagged look               | Grainy film texture             | Grainy film, retro style         | Graphic design, visual communication   |
| Gritty black and white              | Gritty urban decay              | Group of animals, social         | Group portraiture, multiple people     |
| HDR photo rendering                 | HDR, high dynamic range         | Halation, glowing highlights     | Hand-drawn sketchy feel                |
| Hard light defined                  | Hard light shadows              | Heavily textured impasto         | High contrast, dramatic lighting       |
| High saturation, vivid colors       | High-angle shot looking         | High-key bright lighting         | High-speed photography                 |
| Holographic iridescent effect       | Horror art, scary imagery       | Hudson River School              | Hyperlapse, moving time-lapse          |
| Hyperrealism, beyond realism        | Illuminated manuscript gold     | Illustrative, narrative imagery  | Impressionism, loose brushstrokes      |
| Impressionist brushstrokes          | Industrial mechanical elements  | Infographic data visualization   | Infrared luminescence, glowing foliage |
| Infrared photography                | Infrared, false color           | Infrared, heat signature         | Ink wash fluid                         |
| Installation art, three-dimensional | Interactive art, participation  | Isometric projection view        | Jewelry intricate design               |
| Kinetic art movement                | Kinetic art, movement           | Land art earthworks              | Landscape art, natural scenery         |
| Leading lines perspective           | Leading lines, guide eye        | Lens flare sunlight              | Lens flare, bright streaks             |
| Light art, illumination             | Light leak, color streaks       | Light painting trails            | Line art contour                       |
| Line drawing, simple outline        | Linocut bold lines              | Lithograph stone print           | Lithography, planographic print        |
| Lomography film look                | Long exposure shot              | Long exposure, light trails      | Long shot distance                     |
| Loop lighting portrait              | Low angle, animal towering      | Low poly geometric               | Low saturation, muted tones            |
| Low-angle shot upwards              | Low-key dark lighting           | Lowbrow art, underground         | Lowbrow pop surrealism                 |
| Luminism glowing light              | Macro lens close-up             | Macro shot, tiny details         | Mandala circular symmetry              |
| Manga graphic novel                 | Map cartographic representation | Maximalist busy composition      | Maximalist, elaborate design           |
| Medium shot framing                 | Metalwork shaped metal          | Migrating herd, vast landscape   | Miniature diorama world                |
| Miniature effect, tilt-shift        | Minimalism, essential elements  | Minimalist simple lines          | Minimalist, simplified design          |
| Mixed lighting combined             | Monochrome single color         | Monochrome, single color         | Monotype, unique print                 |
| Moody atmospheric lighting          | Moonlit night, stark shadows    | Mosaic tile pieces               | Mosaic, small piece patterns           |
| Motion blur capture                 | Motion blur, animal running     | Motion blur, speed lines         | Mountain range, panoramic view         |
| Multiple exposure, layered images   | Mural art, large-scale painting | Mural large-scale painting       | Naive art, childlike simplicity        |
| Natural organic forms               | Negative space drawing          | Negative space framing           | Negative space, empty area             |
| Neoclassical refined style          | Neon light glowing              | Nesting birds, detailed feathers | Night photography cityscape            |

Continued on next page

**Table G.1 – continued from previous page**

|                                  |                                       |                                   |                                          |
|----------------------------------|---------------------------------------|-----------------------------------|------------------------------------------|
| Night vision, green tint         | Night vision, red tint                | Oil painting texture              | Oil painting, thick texture              |
| Op Art optical                   | Op art, visual illusions              | Optical illusion, trickery        | Origami, paper folding                   |
| Ornate intricate design          | Orthochromatic film effect            | Outrun style neon                 | Outsider art raw                         |
| Outsider art, untrained          | Over-the-shoulder perspective shot    | Overcast sky diffusion            | Overexposed, bright white                |
| Overgrown, vegetation focus      | Panning motion blur                   | Panning, blurred background       | Panoramic stitched view                  |
| Panoramic, wide environment      | Paper cut layered                     | Paper marbling, swirling patterns | Parent and offspring                     |
| Pastel drawing, blended colors   | Pastel soft blending                  | Pattern repetition, visual rhythm | Pen and ink                              |
| Pencil shading detailed          | Performance art, live action          | Photojournalism, storytelling     | Photorealism hyper-detailed              |
| Photorealism, lifelike detail    | Pinhole camera image                  | Pixel art retro                   | Pixel art, retro game                    |
| Pixelated low resolution         | Pixelated, low resolution             | Point-of-view subjective shot     | Pointillism, tiny dots                   |
| Pointillist dot technique        | Polaroid transfer, image manipulation | Polychrome, many colors           | Pop art bright                           |
| Pop art, bold colors             | Portraiture, individual likeness      | Positive space, subject focus     | Pottery ceramic art                      |
| Pre-Raphaelite detailed beauty   | Predator-prey interaction             | Psychedelic art, mind-altering    | Quilling, paper filigree                 |
| Quilting patchwork design        | Rack focus shift                      | Radial balance, circular focus    | Rainy day, blurred drops                 |
| Realist everyday life            | Rembrandt lighting portrait           | Renaissance classical style       | Retro style, vintage look                |
| Rocky terrain, jagged edges      | Rococo ornate details                 | Romantic emotional landscape      | Rule of thirds                           |
| Rule of thirds, composition      | Rustic textured surface               | Sandy desert, dunes stretch       | Saturated vibrant colors                 |
| Schematic diagram layout         | Sci-fi art, space, technology         | Screen printing bold              | Screen printing, stencil print           |
| Sculpture three-dimensional form | Seascape art, ocean views             | Selective color isolation         | Selective focus, sharp animal            |
| Self-portraiture, artist's image | Sepia tone, vintage look              | Sepia toned photograph            | Serene calming atmosphere                |
| Shallow focus blur               | Sharp contrasting lines               | Sharp focus, crisp details        | Short exposure, frozen motion            |
| Short lighting slimming          | Sidelit subject, defined features     | Silhouette backlit subject        | Silhouette black shape                   |
| Silhouette, dark shape           | Single-point lighting setup           | Sleek modern minimalist           | Slow motion, extended time               |
| Smooth airbrushed finish         | Smooth digital, clean look            | Snowy scene, whiteout effect      | Social realism commentary                |
| Soft focus, dreamy effect        | Soft light diffused                   | Soft pastel hues                  | Softbox diffused light                   |
| Solar punk green                 | Solitary animal, minimalist           | Sound art, auditory               | Sparse woodland, bare trees              |
| Specular highlights reflections  | Split lighting dramatic               | Split toning effect               | Split toning, colored highlights/shadows |
| Spring growth, fresh shoots      | Square color scheme                   | Staged photography                | Stained glass colorful                   |
| Steampunk Victorian sci-fi       | Steampunk style, Victorian sci-fi     | Stencil art spray                 | Stencil art, cut-out shapes              |
| Stippling dot shading            | Stop motion, frame-by-frame           | Street art graffiti               | Street art, urban style                  |

Continued on next page

**Table G.1 – continued from previous page**

|                                   |                                |                                    |                                 |
|-----------------------------------|--------------------------------|------------------------------------|---------------------------------|
| Studio portrait lighting          | Sumi-e ink painting            | Summer heat, shimmering air        | Sunlit glade, dappled light     |
| Sunrise glow, warm tones          | Sunset silhouette, golden hour | Surreal, bizarre, dreamlike        | Surrealism, dreamlike imagery   |
| Surrealist dreamlike scene        | Symmetrical balanced framing   | Symmetry, balanced image           | Technical drawing precise       |
| Telephoto, compressed perspective | Tessellated repeating design   | Tetradic color rectangle           | Textile art fabric              |
| Texture contrast, rough/smooth    | Thermal imaging, body heat     | Three-point lighting classic       | Tilt-shift effect               |
| Time-lapse sequence frame         | Time-lapse, motion sequence    | Time-lapse, star trails            | Tintype vintage photo           |
| Tonal contrast, light/dark        | Tonalism muted colors          | Triadic color scheme               | Tritone, three-color scheme     |
| Trompe-l'oeil illusionistic       | Two animals, interaction       | Two-point lighting setup           | Two-shot composition framing    |
| Typography, letterforms art       | Ukiyo-e Japanese woodblock     | Ultraviolet, unseen spectrum       | Underexposed, deep shadows      |
| Underwater photography scene      | Underwater, murky view         | Urban art, cityscapes              | Vanishing point perspective     |
| Vaporwave aesthetic photo         | Vector graphic, stylized       | Vector graphics scalable           | Vibrant color explosion         |
| Vignette, darkened edges          | Vignetting, dark corners       | Vintage Polaroid picture           | Vintage retro charm             |
| Virtual reality, immersive        | Visionary art, spiritual       | Water reflection, mirrored image   | Watercolor painting, soft edges |
| Watercolor wash effect            | Waterfall cascade, misty spray | Wet collodion, antique photography | Wet plate collodion             |
| Wheatpaste poster art             | Whimsical playful style        | Wide shot, animal small            | Wide-angle perspective          |
| Wide-angle, forest scene          | Wildlife art, animal subjects  | Winter frost, intricate patterns   | Wood carving relief             |
| Woodcut print rustic              | Woodcut, relief print          | Worm's-eye view low                | X-ray skeletal view             |
| X-ray vision, skeletal structure  | Zentangle intricate patterns   | Zoom burst effect                  | Zoom burst, radial blur         |
